# Supplementary material for: Cholesterol-based nonsymmetric liquid crystal dimers: an overview
Source: Royal Society of Chemistry journal article supplement (doi:10.1039/b804579h), 2008-01-01
Supplement: b804579h.pdf [file b804579h.pdf]

## Electronic supplementary information (ESI)

### Cholesterol-based non-symmetric liquid crystal dimers: an overview

C. V. Yelamaggad\*, G. Shanker, Uma S. Hiremath and S. Krishna Prasad  
Centre for Liquid Crystal Research, Jalahalli, Bangalore 560 013, INDIA

#### 1. Schiff's bases (azomethines)

**Table S1:** Phase behavior of cholesterol-based dimers having Schiff's base anisometric segment. Cr = crystal;  $\text{Sm}\tilde{\text{C}}$  = two-dimensional modulated smectic C phase (ribbon phase);  $\text{Sm}_{q3}$  = smectic phase having a periodicity lower than half the molecular length ( $q3$  is the wave vector);  $\text{Sm}_{ic}$  = incommensurate smectic A phase;  $\text{Sm}_{q1\text{LT/HT}}$  = smectic phase having a layer spacing close to molecular length ( $q1$  is the wave vector; LT = low temperature, HT = high temperature);  $\text{SmC}^*$  = chiral smectic C phase;  $\text{SmA}$  = smectic A phase;  $\text{Sm1}$ ,  $\text{Sm2}$  = smectic ( $\text{Sm}_{q3}$ ) phase;  $\text{Sm1}'$ ,  $\text{Sm2}'$  = tilted commensurate smectic ( $\text{Sm}_{q1}$ ) phase;  $\text{SmX}_1$ ,  $\text{SmX}_2$  = unknown smectic phases; TGB = twist grain boundary phase;  $\text{N}^*$  = chiral nematic phase; BPI = blue phase I; BPII = blue phase II; I = isotropic phase; ( ) = monotropic behavior. Generally, dimers are tabulated in the order of their appearance in the literature.

Note: For references mentioned in the last column, see the reference section of the main text.

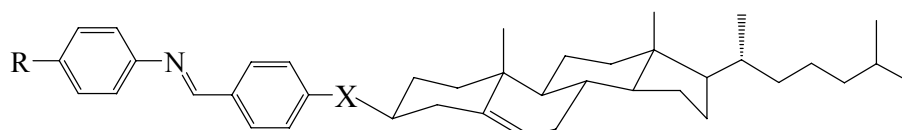

| Dimer      | R                                             | X                                      | Phase sequence and transition temperatures in °C                                                                                                                      | Ref. |
|------------|-----------------------------------------------|----------------------------------------|-----------------------------------------------------------------------------------------------------------------------------------------------------------------------|------|
| <b>1-1</b> | $n\text{-C}_4\text{H}_9$                      | $\text{O}(\text{CH}_2)_5\text{COO}$    | Cr 85 $\text{Sm}_{ic}$ 144.5 $\text{SmC}^*$ 149 $\text{SmA}_{ic}$ 151.5 $\text{SmC}^*$ 165 TGB 168 $\text{N}^*$ 192 I                                                 | 15   |
|            |                                               |                                        | Cr 85 $\text{Sm}_{ic}$ 144.5 $\text{SmC}^*$ 149 $\text{Sm}_{ic}$ 151.5 $\text{SmC}^*$ 165 TGB 168 $\text{N}^*$ 191 BP 192 I                                           | 16   |
|            |                                               |                                        | Cr 85 $\text{Sm}\tilde{\text{C}}$ 97 $\text{Sm}_{q3}$ 141 $\text{Sm}_{ic}$ 146 $\text{Sm}_{q1\text{LT}}$ 152 $\text{Sm}_{q1\text{HT}}$ 164 TGB 168 $\text{N}^*$ 192 I | 17   |
| <b>1-2</b> | $n\text{-C}_4\text{H}_9$                      | $\text{O}(\text{CH}_2)_4\text{COO}$    | Cr 85 $\text{SmC}^*$ 134 $\text{SmC}^*$ 141 TGB 142 $\text{N}^*$ 153.8 BPI 154.8 BPII 155.6 I                                                                         | 16   |
| <b>1-3</b> | $n\text{-C}_4\text{H}_9$                      | $\text{O}(\text{CH}_2)_7\text{COO}$    | Cr 148 $\text{SmA}$ 151.5 TGB 152.5 $\text{N}^*$ 172.8 BP 173.5 I                                                                                                     | 16   |
| <b>1-4</b> | $n\text{-C}_4\text{H}_9$                      | $\text{O}(\text{CH}_2)_{10}\text{COO}$ | Cr 104 $\text{SmA}$ 124.5 TGB 125 $\text{N}^*$ 140 BPI 140.6 BPII 141.2 I                                                                                             | 16   |
| <b>1-5</b> | $\text{CH}=\text{CHCO}_2\text{C}_2\text{H}_5$ | $\text{O}(\text{CH}_2)_5\text{COO}$    | Cr 139 $\text{Sm}_{ic}$ 140 $\text{Sm}_{q3}$ 206 $\text{N}^*$ 238 I                                                                                                   | 17   |

|             |                                                                                   |                                        |                                                                             |    |
|-------------|-----------------------------------------------------------------------------------|----------------------------------------|-----------------------------------------------------------------------------|----|
| <b>1-6</b>  | <i>n</i> -C <sub>2</sub> H <sub>5</sub>                                           | O(CH <sub>2</sub> ) <sub>5</sub> COO   | Cr 139Sm <sub>2</sub> (96) Sm <sub>1</sub> 157 N* 198 I                     | 18 |
| <b>1-7</b>  | <i>n</i> -C <sub>3</sub> H <sub>7</sub>                                           | O(CH <sub>2</sub> ) <sub>5</sub> COO   | Cr 112 Sm <sub>2</sub> (98) Sm <sub>1</sub> 149 TGB 151 N* 196 I            | 18 |
| <b>1-8</b>  | <i>n</i> -C <sub>5</sub> H <sub>11</sub>                                          | O(CH <sub>2</sub> ) <sub>5</sub> COO   | Cr 70 Sm <sub>2</sub> ' 102 Sm <sub>1</sub> ' 176 N* 190 I                  | 18 |
| <b>1-9</b>  | <i>n</i> -C <sub>6</sub> H <sub>13</sub>                                          | O(CH <sub>2</sub> ) <sub>5</sub> COO   | Cr 84 Sm <sub>2</sub> ' 112 Sm <sub>1</sub> ' 181 N* 188 I                  | 18 |
| <b>1-10</b> | <i>n</i> -C <sub>10</sub> H <sub>21</sub>                                         | O(CH <sub>2</sub> ) <sub>5</sub> COO   | Cr 84 Sm <sub>2</sub> ' 115 Sm <sub>1</sub> ' 184 I                         | 18 |
| <b>1-11</b> | <i>n</i> -C <sub>12</sub> H <sub>25</sub>                                         | O(CH <sub>2</sub> ) <sub>5</sub> COO   | Cr 63.6 SmC* 104.8 SmA 174.7 I                                              | 19 |
| <b>1-12</b> | 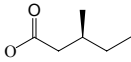 | O(CH <sub>2</sub> ) <sub>5</sub> COO   | Cr 127.7 SmA 169.1 TGB 169.5 N* 193.2 I                                     | 19 |
| <b>1-13</b> |  | O(CH <sub>2</sub> ) <sub>5</sub> COO   | Cr 120.7 SmX <sub>1</sub> 150.5 SmX <sub>2</sub> 165.6 TGB 165.7 N* 185.4 I | 19 |
| <b>1-14</b> |  | O(CH <sub>2</sub> ) <sub>5</sub> COO   | Cr 105.4 SmC* (84.2) SmA 123.5 N* 148.5 I                                   | 19 |
| <b>1-15</b> | <i>n</i> -OC <sub>3</sub> H <sub>7</sub>                                          | O(CH <sub>2</sub> ) <sub>5</sub> COO   | Cr 117 Sm <sub>q3</sub> 171 N* 212 I                                        | 20 |
| <b>1-16</b> | COCH <sub>3</sub>                                                                 | O(CH <sub>2</sub> ) <sub>5</sub> COO   | Cr 116 Sm <sub>q1</sub> 156 TGB 160 N* 216 I                                | 20 |
| <b>1-17</b> | CN                                                                                | O(CH <sub>2</sub> ) <sub>5</sub> COO   | Cr 160 Sm <sub>q1</sub> <sup>†</sup> 176 TGB 178 N* 216 I                   | 20 |
| <b>1-18</b> | NO <sub>2</sub>                                                                   | O(CH <sub>2</sub> ) <sub>5</sub> COO   | Cr 178 Sm <sub>q1</sub> <sup>†</sup> (165) TGB (167) N* 208 I               | 20 |
| <b>1-19</b> | <i>n</i> -C <sub>8</sub> H <sub>17</sub>                                          | O(CH <sub>2</sub> ) <sub>5</sub> COO   | Cr 130.5 SmC* (124.1) SmA 195.5 N* 197.6 I                                  | 21 |
| <b>1-20</b> | CH <sub>2</sub> (CF <sub>2</sub> ) <sub>6</sub> CF <sub>3</sub>                   | O(CH <sub>2</sub> ) <sub>5</sub> COO   | Cr 111.9 SmC* 143.7 SmA 235.4 I                                             | 21 |
| <b>1-21</b> | <i>n</i> -OC <sub>2</sub> H <sub>5</sub>                                          | OOC(CH <sub>2</sub> ) <sub>2</sub> COO | Cr 166.7 N* 256.2 I                                                         | 22 |
| <b>1-22</b> | <i>n</i> -OC <sub>5</sub> H <sub>11</sub>                                         | OOC(CH <sub>2</sub> ) <sub>2</sub> COO | Cr 118.5 N* 243.1 I                                                         | 22 |
| <b>1-23</b> | <i>n</i> -OC <sub>7</sub> H <sub>15</sub>                                         | OOC(CH <sub>2</sub> ) <sub>2</sub> COO | Cr 132.5 N* 234.1 I                                                         | 22 |

<sup>†</sup> The Sm<sub>q1</sub> phase formed by dimers **1-17** and **1-18** is in fact similar to the SmA<sub>d</sub> phase seen for the polar system satisfying the condition  $L < d < 2L$

## 2. Tolanes (diphenylacetylenes)

**Table S2<sup>a</sup>:** Phase behavior of cholesterol-based dimers consisting of tolane anisometric moiety. TGBA = twist grain boundary phase featuring SmA blocks; TGBC\* = twist grain boundary phase having SmC\* slabs; BP = blue phase; M<sub>x</sub> = Unknown mesophase.

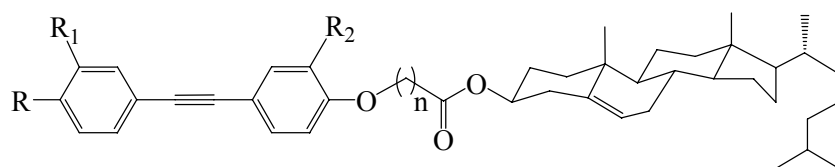

| Dimer       | R                                                                                  | R <sub>1</sub> | R <sub>2</sub> | n | Phase sequence and transition temperatures in °C                                         | Ref.     |
|-------------|------------------------------------------------------------------------------------|----------------|----------------|---|------------------------------------------------------------------------------------------|----------|
| <b>2-1</b>  | <i>n</i> -OC <sub>4</sub> H <sub>9</sub>                                           | H              | H              | 5 | Cr 111.5 N* 203.3 I                                                                      | 23       |
|             |                                                                                    |                |                |   | Cr 113 TGB <sub>q3</sub> 120 N* 205 I                                                    | 27       |
| <b>2-2</b>  |   | H              | H              | 4 | Cr 85.1 SmA 108.4 I                                                                      | 25       |
| <b>2-3</b>  |  | H              | H              | 5 | Cr 89 SmA 146.2 I                                                                        | 25       |
|             |                                                                                    |                |                |   |                                                                                          | 30       |
| <b>2-4</b>  | <i>n</i> -OC <sub>6</sub> H <sub>13</sub>                                          | H              | H              | 5 | Cr 130.8 TGBC* (105) TGBA (120) SmA 152.5<br>TGBA 161.2 N* 197.3 I                       | 26       |
|             |                                                                                    |                |                |   | Cr 129 TGBC* (110) SmA <sub>q1</sub> 155 TGBA <sub>q1</sub> 164 N*<br>199 I              | 27       |
| <b>2-5</b>  | <i>n</i> -OC <sub>3</sub> H <sub>7</sub>                                           | H              | H              | 5 | Cr 126 Sm <sub>q3</sub> 129 TGB <sub>q3</sub> 131 N* 206 I                               | 27       |
| <b>2-6</b>  | <i>n</i> -OC <sub>5</sub> H <sub>11</sub>                                          | H              | H              | 5 | Cr 125 TGBA <sub>q1</sub> 151 N* 199 I                                                   | 27       |
|             |                                                                                    |                |                |   | Cr 124.8 N* 199.3 I †                                                                    | 31       |
| <b>2-7</b>  | <i>n</i> -OC <sub>7</sub> H <sub>15</sub>                                          | H              | H              | 5 | Cr 114 SmC* <sub>q1</sub> (113) SmA <sub>q1</sub> 168 TGBA <sub>q1</sub> 170 N*<br>192 I | 27       |
| <b>2-8</b>  | <i>n</i> -OC <sub>10</sub> H <sub>21</sub>                                         | H              | H              | 5 | Cr 95 SmC* <sub>q1</sub> 132 SmA <sub>q1</sub> 183 N* 186 I                              | 27       |
| <b>2-9</b>  | <i>n</i> -C <sub>4</sub> H <sub>9</sub>                                            | H              | H              | 3 | Cr 155 SmA 186.8 TGB <sup>b</sup> -N* 204.7 I                                            | 28<br>32 |
| <b>2-10</b> | <i>n</i> -C <sub>5</sub> H <sub>11</sub>                                           | H              | H              | 3 | Cr 153.6 SmC* (81.7) SmA 178.1 TGB <sup>b</sup> -N* 195.6 I                              | 28       |
| <b>2-11</b> | <i>n</i> -C <sub>6</sub> H <sub>13</sub>                                           | H              | H              | 3 | Cr 119.3 SmC* (81.9) SmA 196.4 TGB <sup>b</sup> -N* 202.4 I                              | 28<br>33 |
| <b>2-12</b> | <i>n</i> -C <sub>7</sub> H <sub>15</sub>                                           | H              | H              | 3 | Cr 82.8 SmA 193.3 TGB <sup>b</sup> -N* 196.3 I                                           | 28       |
| <b>2-13</b> | <i>n</i> -C <sub>4</sub> H <sub>9</sub>                                            | H              | H              | 4 | Cr 118.2 SmA 126.8 TGB <sup>b</sup> -N*-BP <sup>b</sup> 148.3 I                          | 28       |

|      |                                                                                     |                 |                 |   |                                                                       |    |
|------|-------------------------------------------------------------------------------------|-----------------|-----------------|---|-----------------------------------------------------------------------|----|
| 2-14 | $n\text{-C}_5\text{H}_{11}$                                                         | H               | H               | 4 | Cr 115.8 SmA 134.6 TGB <sup>b</sup> -N*-BP <sup>b</sup> 150.4 I       | 28 |
| 2-15 | $n\text{-C}_6\text{H}_{13}$                                                         | H               | H               | 4 | Cr 105.9 SmA 138.1 TGB <sup>b</sup> -N* 146.1 I                       | 28 |
| 2-16 | $n\text{-C}_4\text{H}_9$                                                            | H               | H               | 5 | Cr 99 Sm <sub>q1</sub> 146 TGB <sub>q1</sub> 150.5 N* 185.4 I         | 24 |
|      |                                                                                     |                 |                 |   | Cr 99.5 SmC* (83.4) SmA 152.5 TGB <sup>b</sup> -N* 186.1 I            | 28 |
| 2-17 | $n\text{-C}_7\text{H}_{15}$                                                         | H               | H               | 4 | Cr 103 SmA 142.2 TGB <sup>b</sup> -N*-BP <sup>b</sup> 146.5 I         | 28 |
| 2-18 | $n\text{-C}_5\text{H}_{11}$                                                         | H               | H               | 5 | Cr 114.9 SmC* (84.2) SmA 161.4 TGB <sup>b</sup> -N* 185.4 I           | 28 |
| 2-19 | $n\text{-C}_6\text{H}_{13}$                                                         | H               | H               | 5 | Cr 88.8 SmC* 100.4 SmA 166.7 TGB <sup>b</sup> -N* 180.3 I             | 28 |
| 2-20 | $n\text{-C}_7\text{H}_{15}$                                                         | H               | H               | 5 | Cr 108 SmC* (99.7) SmA 170.8 TGB <sup>b</sup> -N* 178.7 I             | 28 |
| 2-21 | $n\text{-C}_4\text{H}_9$                                                            | H               | H               | 7 | Cr 146.9 SmA (132.6) TGB <sup>b</sup> -N* 168.8 I                     | 28 |
| 2-22 | $n\text{-C}_5\text{H}_{11}$                                                         | H               | H               | 7 | Cr 145.7 N* 168.4 I                                                   | 28 |
| 2-23 | $n\text{-C}_6\text{H}_{13}$                                                         | H               | H               | 7 | Cr 90.9 SmC* 97.9 SmA 167.5 TGB <sup>b</sup> -N* 180.3 I              | 28 |
| 2-24 | $n\text{-C}_7\text{H}_{15}$                                                         | H               | H               | 7 | Cr 128.3 SmC* (98.3) SmA 139.8 TGB 142.4 N* 164.1 I                   | 28 |
| 2-25 |   | NO <sub>2</sub> | H               | 5 | Cr 86.4 SmA 111.2 N* 113.1 I                                          | 29 |
| 2-26 |  | F               | H               | 5 | Cr 84.4 SmA 145.6 I                                                   | 29 |
| 2-27 |  | H               | H               | 5 | Cr 120.8 M <sub>x</sub> (63.1) SmA 159.2 TGB <sup>b</sup> -N* 182.9 I | 29 |
| 2-28 |  | H               | NO <sub>2</sub> | 5 | Cr 138.6 SmA (134.1) N* 143.8 I                                       | 29 |
| 2-29 |  | H               | H               | 5 | Cr 92.8 SmC* 99.9 SmA 168.3 I                                         | 29 |

<sup>a</sup> The transition between different crystalline forms have been ignored; only the crystalline form (temperature) melting into the mesophase is mentioned. <sup>b</sup> A very short lived phase. <sup>†</sup> The reinvestigation on the reported phase sequence (ref. 31) is in progress

### 3. Azobenzenes (diphenyldiazenes)

**Table S3:** Phase behavior of cholesterol-based dimers comprising azobenzene anisometric segment. Sm $\tilde{A}$  = Two-dimensional modulated smectic A antiphase; Sm = smectic phase; SmX = solid-like phase; Sm1 = Unknown fluid smectic phase

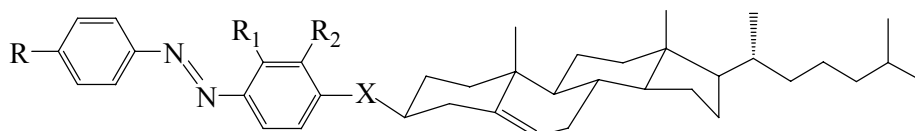

| Dimer | R                                                                | R <sub>1</sub> | R <sub>2</sub> | X                                                                                         | Phase sequence and transition temperatures in °C                              | Ref.     |
|-------|------------------------------------------------------------------|----------------|----------------|-------------------------------------------------------------------------------------------|-------------------------------------------------------------------------------|----------|
| 3-1   | <i>n</i> -C <sub>4</sub> H <sub>9</sub>                          | H              | H              | O(CH <sub>2</sub> ) <sub>5</sub> COO                                                      | Cr 113 Sm $\tilde{A}$ 137 Sm <sub>q1</sub> 160 TGB <sub>q1</sub> 163 N* 194 I | 17<br>24 |
| 3-2   | <i>n</i> -OC <sub>8</sub> H <sub>17</sub>                        | H              | H              | O(CH <sub>2</sub> ) <sub>5</sub> COO                                                      | Cr 112 SmC* 135.7 SmA 187.5 N* 199 I                                          | 21       |
| 3-3   | OCH <sub>2</sub> (CF <sub>2</sub> ) <sub>6</sub> CF <sub>3</sub> | H              | H              | O(CH <sub>2</sub> ) <sub>5</sub> COO                                                      | Cr 110.1 SmA 246.9 I                                                          | 21       |
| 3-4   | <i>n</i> -C <sub>4</sub> H <sub>9</sub>                          | H              | H              | ooc(H <sub>2</sub> C) <sub>8</sub> (C≡C) <sub>2</sub> (CH <sub>2</sub> ) <sub>8</sub> COO | Cr 79 SmA 109 I                                                               | 34       |
| 3-5   | <i>n</i> -C <sub>7</sub> H <sub>15</sub>                         | H              | H              | ooc(H <sub>2</sub> C) <sub>8</sub> (C≡C) <sub>2</sub> (CH <sub>2</sub> ) <sub>8</sub> COO | Cr 89 SmA 112 I                                                               | 34       |
| 3-6   | <i>n</i> -C <sub>12</sub> H <sub>25</sub>                        | H              | H              | ooc(H <sub>2</sub> C) <sub>8</sub> (C≡C) <sub>2</sub> (CH <sub>2</sub> ) <sub>8</sub> COO | Cr 93 SmA 108 I                                                               | 34       |
| 3-7   | <i>n</i> -C <sub>14</sub> H <sub>29</sub>                        | H              | H              | ooc(H <sub>2</sub> C) <sub>8</sub> (C≡C) <sub>2</sub> (CH <sub>2</sub> ) <sub>8</sub> COO | Cr 96 SmA 103 I                                                               | 34       |
| 3-8   | <i>n</i> -C <sub>16</sub> H <sub>33</sub>                        | H              | H              | ooc(H <sub>2</sub> C) <sub>8</sub> (C≡C) <sub>2</sub> (CH <sub>2</sub> ) <sub>8</sub> COO | I 100 SmA 74 Cr                                                               | 34       |
| 3-9   | H                                                                | H              | H              | ooc(H <sub>2</sub> C) <sub>8</sub> (C≡C) <sub>2</sub> (CH <sub>2</sub> ) <sub>8</sub> COO | Cr 70 SmA 76 N* 82 I                                                          | 34       |
| 3-10  | H                                                                | H              | H              | OOC(CH <sub>2</sub> ) <sub>20</sub> COO                                                   | Cr 97 N* 104 I                                                                | 34       |
| 3-11  | H                                                                | H              | H              | OOC(CH <sub>2</sub> ) <sub>6</sub> COO                                                    | Cr 123.5 N* 153.2 I                                                           | 35       |
| 3-12  | H                                                                | H              | H              | OOC(CH <sub>2</sub> ) <sub>7</sub> COO                                                    | Cr 110.6 Sm 114.9 I                                                           | 35<br>36 |
| 3-13  | H                                                                | H              | H              | OOC(CH <sub>2</sub> ) <sub>8</sub> COO                                                    | Cr 102 N* 141.5 I                                                             | 35       |
| 3-14  | H                                                                | H              | H              | OOC(CH <sub>2</sub> ) <sub>9</sub> COO                                                    | Cr 109.3 N* 116.8 I                                                           | 35       |
| 3-15  | H                                                                | H              | H              | OOC(CH <sub>2</sub> ) <sub>10</sub> COO                                                   | Cr 97.1 N* 131.7 I                                                            | 35       |
| 3-16  | H                                                                | H              | H              | OOC(CH <sub>2</sub> ) <sub>11</sub> COO                                                   | Cr 99.9 N* 114.3 I                                                            | 35       |

|             |                                                                  |   |   |                                         |                                                          |    |
|-------------|------------------------------------------------------------------|---|---|-----------------------------------------|----------------------------------------------------------|----|
| <b>3-17</b> | H                                                                | H | H | OOC(CH <sub>2</sub> ) <sub>12</sub> COO | Cr 112.7 N* 121.9 I                                      | 35 |
| <b>3-18</b> | H                                                                | H | H | OOC(CH <sub>2</sub> ) <sub>13</sub> COO | Cr 100.3 N* 112.3 I                                      | 35 |
| <b>3-19</b> | H                                                                | H | H | OOC(CH <sub>2</sub> ) <sub>14</sub> COO | Cr 96.6 N* 120.1 I                                       | 35 |
| <b>3-20</b> | <i>n</i> -C <sub>7</sub> H <sub>15</sub>                         | H | H | OOC(CH <sub>2</sub> ) <sub>7</sub> COO  | Cr 122.7 SmA 125.4 N* 145.7 I                            | 36 |
| <b>3-21</b> | <i>n</i> -C <sub>7</sub> H <sub>15</sub>                         | H | H | OOC(CH <sub>2</sub> ) <sub>8</sub> COO  | Cr 86.6 SmC* 110.6 SmA 126.2 N* 159.3 I                  | 37 |
| <b>3-22</b> | <i>n</i> -OC <sub>8</sub> H <sub>17</sub>                        | H | H | O(CH <sub>2</sub> ) <sub>4</sub> COO    | Cr 119.2 SmA 161.2 N* 167.6 I                            | 38 |
| <b>3-23</b> | <i>n</i> -OC <sub>8</sub> H <sub>17</sub>                        | H | H | O(CH <sub>2</sub> ) <sub>6</sub> COO    | Cr 132.7 SmA (41.7) N* 162.6 I                           | 38 |
| <b>3-24</b> | <i>n</i> -OC <sub>8</sub> H <sub>17</sub>                        | H | H | O(CH <sub>2</sub> ) <sub>7</sub> COO    | Cr 145.7 SmA 153.6 N* 180.9 I                            | 38 |
| <b>3-25</b> | <i>n</i> -OC <sub>8</sub> H <sub>17</sub>                        | H | H | O(CH <sub>2</sub> ) <sub>10</sub> COO   | Cr 118.5 SmA (45.2) N* 153.7 I                           | 38 |
| <b>3-26</b> | <i>n</i> -OC <sub>8</sub> H <sub>17</sub>                        | H | H | O(CH <sub>2</sub> ) <sub>11</sub> COO   | Cr 128.5 SmA 147 N* 160 I                                | 38 |
| <b>3-27</b> | OCH <sub>2</sub> (CF <sub>2</sub> ) <sub>6</sub> CF <sub>3</sub> | H | H | O(CH <sub>2</sub> ) <sub>4</sub> COO    | Cr 123.6 SmA 231.3 I                                     | 38 |
| <b>3-28</b> | OCH <sub>2</sub> (CF <sub>2</sub> ) <sub>6</sub> CF <sub>3</sub> | H | H | O(CH <sub>2</sub> ) <sub>6</sub> COO    | Cr 110.5 SmA 214 I                                       | 38 |
| <b>3-29</b> | OCH <sub>2</sub> (CF <sub>2</sub> ) <sub>6</sub> CF <sub>3</sub> | H | H | O(CH <sub>2</sub> ) <sub>7</sub> COO    | Cr 110.3 SmA 221.8 I                                     | 38 |
| <b>3-30</b> | OCH <sub>2</sub> (CF <sub>2</sub> ) <sub>6</sub> CF <sub>3</sub> | H | H | O(CH <sub>2</sub> ) <sub>10</sub> COO   | Cr 101.3 SmC* (95.4) SmA 190 I                           | 38 |
| <b>3-31</b> | OCH <sub>2</sub> (CF <sub>2</sub> ) <sub>6</sub> CF <sub>3</sub> | H | H | O(CH <sub>2</sub> ) <sub>11</sub> COO   | Cr 80.1 SmA 184.2 I                                      | 38 |
| <b>3-32</b> | <i>n</i> -OC <sub>8</sub> H <sub>17</sub>                        | F | F | O(CH <sub>2</sub> ) <sub>4</sub> COO    | Cr 88.4 SmA (75.2) N* 149 I                              | 39 |
| <b>3-33</b> | <i>n</i> -OC <sub>8</sub> H <sub>17</sub>                        | F | F | O(CH <sub>2</sub> ) <sub>5</sub> COO    | Cr 89.5 SmX (60.2) Sm <sup>Å</sup> 127 SmC* 139 N* 184 I | 39 |
| <b>3-34</b> | <i>n</i> -OC <sub>8</sub> H <sub>17</sub>                        | F | F | O(CH <sub>2</sub> ) <sub>6</sub> COO    | Cr 105 SmX (72.8) N* 143 I                               | 39 |
| <b>3-35</b> | <i>n</i> -OC <sub>8</sub> H <sub>17</sub>                        | F | F | O(CH <sub>2</sub> ) <sub>7</sub> COO    | Cr 100 TGBC (96.6) SmC* 131 N* 170 I                     | 39 |
| <b>3-36</b> | <i>n</i> -OC <sub>8</sub> H <sub>17</sub>                        | F | F | O(CH <sub>2</sub> ) <sub>8</sub> COO    | Cr 107 SmX 115 N* 140 I                                  | 39 |
| <b>3-37</b> | <i>n</i> -OC <sub>8</sub> H <sub>17</sub>                        | F | F | O(CH <sub>2</sub> ) <sub>9</sub> COO    | Cr 99.6 TGBC (87.9) SmI 126 SmC* 142 N* 156 I            | 39 |
| <b>3-38</b> | <i>n</i> -OC <sub>8</sub> H <sub>17</sub>                        | F | F | O(CH <sub>2</sub> ) <sub>10</sub> COO   | Cr 96.1 SmX (38.5) N* 140 I                              | 39 |
| <b>3-39</b> | <i>n</i> -OC <sub>8</sub> H <sub>17</sub>                        | F | F | O(CH <sub>2</sub> ) <sub>11</sub> COO   | Cr 99.6 SmX (74.1) TGBC (86.3) SmC* 140 N* 150 I         | 39 |
| <b>3-40</b> | <i>n</i> -OC <sub>8</sub> H <sub>17</sub>                        | F | F | O(CH <sub>2</sub> ) <sub>12</sub> COO   | Cr 80.3 SmX (48.1) N* 136 I                              | 39 |
| <b>3-41</b> | OCH <sub>2</sub> (CF <sub>2</sub> ) <sub>6</sub> CF <sub>3</sub> | F | F | O(CH <sub>2</sub> ) <sub>4</sub> COO    | Cr 73.6 SmA 211 I                                        | 39 |
| <b>3-42</b> | OCH <sub>2</sub> (CF <sub>2</sub> ) <sub>6</sub> CF <sub>3</sub> | F | F | O(CH <sub>2</sub> ) <sub>5</sub> COO    | Cr 111 SmA 224 I                                         | 39 |
| <b>3-43</b> | OCH <sub>2</sub> (CF <sub>2</sub> ) <sub>6</sub> CF <sub>3</sub> | F | F | O(CH <sub>2</sub> ) <sub>6</sub> COO    | Cr 70.6 SmA 189 I                                        | 39 |

|             |                                                                  |   |   |                                        |                     |    |
|-------------|------------------------------------------------------------------|---|---|----------------------------------------|---------------------|----|
| <b>3-44</b> | OCH <sub>2</sub> (CF <sub>2</sub> ) <sub>6</sub> CF <sub>3</sub> | F | F | O(CH <sub>2</sub> ) <sub>7</sub> COO   | Cr 85.6 SmA 207 I   | 39 |
| <b>3-45</b> | OCH <sub>2</sub> (CF <sub>2</sub> ) <sub>6</sub> CF <sub>3</sub> | F | F | O(CH <sub>2</sub> ) <sub>8</sub> COO   | Cr 69.8 SmA 178 I   | 39 |
| <b>3-46</b> | OCH <sub>2</sub> (CF <sub>2</sub> ) <sub>6</sub> CF <sub>3</sub> | F | F | O(CH <sub>2</sub> ) <sub>9</sub> COO   | Cr 92.4 SmA 187 I   | 39 |
| <b>3-47</b> | OCH <sub>2</sub> (CF <sub>2</sub> ) <sub>6</sub> CF <sub>3</sub> | F | F | O(CH <sub>2</sub> ) <sub>10</sub> COO  | Cr 75.3 SmA 169 I   | 39 |
| <b>3-48</b> | OCH <sub>2</sub> (CF <sub>2</sub> ) <sub>6</sub> CF <sub>3</sub> | F | F | O(CH <sub>2</sub> ) <sub>11</sub> COO  | Cr 97.9 SmA 175 I   | 39 |
| <b>3-49</b> | OCH <sub>2</sub> (CF <sub>2</sub> ) <sub>6</sub> CF <sub>3</sub> | F | F | O(CH <sub>2</sub> ) <sub>12</sub> COO  | Cr 75.5 SmA 160 I   | 39 |
| <b>3-50</b> | NO <sub>2</sub>                                                  | H | H | OOC(CH <sub>2</sub> ) <sub>2</sub> COO | Cr 197.1 N* 240.9 I | 40 |
| <b>3-51</b> | NO <sub>2</sub>                                                  | H | H | OOC(CH <sub>2</sub> ) <sub>4</sub> COO | Cr 130.5 N* 220 I   | 40 |
| <b>3-52</b> | NO <sub>2</sub>                                                  | H | H | OOC(CH <sub>2</sub> ) <sub>6</sub> COO | Cr 147.5 N* 194.8 I | 40 |
| <b>3-53</b> | NO <sub>2</sub>                                                  | H | H | OOC(CH <sub>2</sub> ) <sub>8</sub> COO | Cr 145.8 N* 183.7 I | 40 |

#### 4. Biphenyls (phenyl benzenes)

**Table S4<sup>a</sup>:** Phase behavior of cholesterol-based dimers comprising biphenyl mesogenic moiety. The compounds are generally listed as per their order of appearance in the literature. SmE = Smectic E phase (this is not a true smectic phase and therefore it is regarded as crystal E phase in recent times); SmX = Unidentified smectic phase, N\*<sub>re</sub> = reentrant chiral nematic phase.

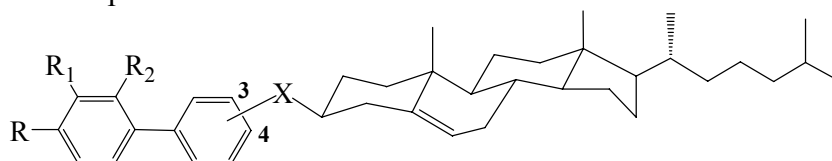

| Dimer | R                                 | R <sub>1</sub> | R <sub>2</sub> | X                                     | Position of X | Phase sequence and transition temperatures in °C | Ref.     |
|-------|-----------------------------------|----------------|----------------|---------------------------------------|---------------|--------------------------------------------------|----------|
| 4-1   | CN                                | H              | H              | O(CH <sub>2</sub> ) <sub>2</sub> COO  | 4             | Cr 152 SmA 157 N* 168 I                          | 41<br>42 |
| 4-2   | CN                                | H              | H              | O(CH <sub>2</sub> ) <sub>3</sub> COO  | 4             | Cr 160 SmA 202 N* 226 I                          | 41<br>42 |
| 4-3   | CN                                | H              | H              | O(CH <sub>2</sub> ) <sub>4</sub> COO  | 4             | Cr 118 SmA 144 N* 168 I                          | 41<br>42 |
| 4-4   | CN                                | H              | H              | O(CH <sub>2</sub> ) <sub>5</sub> COO  | 4             | Cr 128 SmA 168 N* 205 I                          | 41<br>42 |
| 4-5   | CN                                | H              | H              | O(CH <sub>2</sub> ) <sub>6</sub> COO  | 4             | Cr 103 SmA 118 N* 160 I                          | 41<br>42 |
| 4-6   | CN                                | H              | H              | O(CH <sub>2</sub> ) <sub>7</sub> COO  | 4             | Cr 127 SmA 139 N* 185 I                          | 41<br>42 |
| 4-7   | CN                                | H              | H              | O(CH <sub>2</sub> ) <sub>10</sub> COO | 4             | Cr 97 SmA 92 N* 151 I                            | 41<br>42 |
| 4-8   | CN                                | H              | H              | OCH <sub>2</sub> COO                  | 4             | Cr 176 SmA 210 I                                 | 42       |
| 4-9   | COOC <sub>4</sub> H <sub>9</sub>  | H              | H              | O(CH <sub>2</sub> ) <sub>5</sub> COO  | 4             | Cr 110 SmA 162.8 N* 178.2 I                      | 43       |
| 4-10  | COOC <sub>4</sub> H <sub>9</sub>  | H              | H              | O(CH <sub>2</sub> ) <sub>7</sub> COO  | 4             | Cr 86.7 SmA 155.8 N* 159.7 I                     | 43       |
| 4-11  | COOC <sub>4</sub> H <sub>9</sub>  | H              | H              | O(CH <sub>2</sub> ) <sub>10</sub> COO | 4             | Cr 82 SmA 120.4 N* 127.4 I                       | 43       |
| 4-12  | COOC <sub>5</sub> H <sub>11</sub> | H              | H              | O(CH <sub>2</sub> ) <sub>5</sub> COO  | 4             | Cr 118 SmA 154.5 N* 174.5 I                      | 43       |
| 4-13  | COOC <sub>5</sub> H <sub>11</sub> | H              | H              | O(CH <sub>2</sub> ) <sub>7</sub> COO  | 4             | Cr 121.9 SmA 151.2 N* 158.9 I                    | 43       |



|      |                                           |   |   |                                       |   |                                                 |          |
|------|-------------------------------------------|---|---|---------------------------------------|---|-------------------------------------------------|----------|
| 4-14 | COOC <sub>5</sub> H <sub>11</sub>         | H | H | O(CH <sub>2</sub> ) <sub>10</sub> COO | 4 | Cr 98.4 SmA 117.7 N* 126.2 I                    | 43       |
| 4-15 | COOC <sub>6</sub> H <sub>13</sub>         | H | H | O(CH <sub>2</sub> ) <sub>5</sub> COO  | 4 | Cr 132 SmX (99) SmC* (111) SmA 160.5 N* 166.7 I | 43       |
| 4-16 | COOC <sub>6</sub> H <sub>13</sub>         | H | H | O(CH <sub>2</sub> ) <sub>7</sub> COO  | 4 | Cr 137.8 SmE (68) SmA 143.2 N* 151.8 I          | 43       |
| 4-17 | COOC <sub>6</sub> H <sub>13</sub>         | H | H | O(CH <sub>2</sub> ) <sub>10</sub> COO | 4 | Cr 82 SmA 111.7 N* 120.4 I                      | 43       |
| 4-18 | <i>n</i> -OC <sub>6</sub> H <sub>13</sub> | H | H | O(CH <sub>2</sub> ) <sub>3</sub> COO  | 4 | Cr 160 SmA 198 N* 207 I                         | 44<br>45 |
| 4-19 | <i>n</i> -OC <sub>6</sub> H <sub>13</sub> | H | H | O(CH <sub>2</sub> ) <sub>4</sub> COO  | 4 | Cr 127 SmA 133 N* 148 I                         | 44<br>45 |
|      |                                           |   |   |                                       |   | Cr 127.2 SmA 136.1 TGB 137.6 N* 150.7 I         | 46       |
| 4-20 | <i>n</i> -OC <sub>6</sub> H <sub>13</sub> | H | H | O(CH <sub>2</sub> ) <sub>5</sub> COO  | 4 | Cr 136 SmA 162 N* 181 I                         | 44<br>45 |
|      |                                           |   |   |                                       |   | Cr 134.3 SmA 158.3 TGB 164.3 N* 182.1 I         | 46       |
| 4-21 | <i>n</i> -OC <sub>6</sub> H <sub>13</sub> | H | H | O(CH <sub>2</sub> ) <sub>6</sub> COO  | 4 | Cr 103 N* 123 I                                 | 44<br>45 |
| 4-22 | <i>n</i> -OC <sub>6</sub> H <sub>13</sub> | H | H | O(CH <sub>2</sub> ) <sub>7</sub> COO  | 4 | Cr 110 SmA 161 N* 168 I                         | 44<br>45 |
| 4-23 | <i>n</i> -OC <sub>6</sub> H <sub>13</sub> | H | H | O(CH <sub>2</sub> ) <sub>10</sub> COO | 4 | Cr 95 SmA 130 N* 138 I                          | 44<br>45 |
| 4-24 | <i>n</i> -OC <sub>6</sub> H <sub>13</sub> | H | H | O(CH <sub>2</sub> ) <sub>3</sub> COO  | 3 | Cr 58 N* (19) I                                 | 44       |
| 4-25 | <i>n</i> -OC <sub>6</sub> H <sub>13</sub> | H | H | O(CH <sub>2</sub> ) <sub>4</sub> COO  | 3 | Cr 82 SmA (59) I                                | 44       |
| 4-26 | <i>n</i> -OC <sub>6</sub> H <sub>13</sub> | H | H | O(CH <sub>2</sub> ) <sub>5</sub> COO  | 3 | Cr 47 N* (33) I                                 | 44       |
| 4-27 | <i>n</i> -OC <sub>6</sub> H <sub>13</sub> | H | H | O(CH <sub>2</sub> ) <sub>6</sub> COO  | 3 | Cr 66 N* (36) I                                 | 44       |
| 4-28 | <i>n</i> -OC <sub>6</sub> H <sub>13</sub> | H | H | O(CH <sub>2</sub> ) <sub>7</sub> COO  | 3 | Cr 54 N* (33) I                                 | 44       |
| 4-29 | <i>n</i> -OC <sub>6</sub> H <sub>13</sub> | H | H | O(CH <sub>2</sub> ) <sub>10</sub> COO | 3 | Cr 63 N* (42) I                                 | 44       |
| 4-30 | <i>n</i> -OC <sub>4</sub> H <sub>9</sub>  | H | H | O(CH <sub>2</sub> ) <sub>3</sub> COO  | 4 | Cr 171 SmA 169 N* 215 I                         | 45       |
| 4-31 | <i>n</i> -OC <sub>4</sub> H <sub>9</sub>  | H | H | O(CH <sub>2</sub> ) <sub>4</sub> COO  | 4 | Cr 104 N* 152 I                                 | 45       |
|      |                                           |   |   |                                       |   | Cr 104 N* 153.1 I                               | 46       |
| 4-32 | <i>n</i> -OC <sub>4</sub> H <sub>9</sub>  | H | H | O(CH <sub>2</sub> ) <sub>5</sub> COO  | 4 | Cr 118 SmA 171 N* 194 I                         | 45       |
|      |                                           |   |   |                                       |   | Cr 116.6 SmA 166.5 N* 190.6 I                   | 46       |
| 4-33 | <i>n</i> -OC <sub>4</sub> H <sub>9</sub>  | H | H | O(CH <sub>2</sub> ) <sub>6</sub> COO  | 4 | Cr 92 N* 142 I                                  | 45       |
| 4-34 | <i>n</i> -OC <sub>4</sub> H <sub>9</sub>  | H | H | O(CH <sub>2</sub> ) <sub>7</sub> COO  | 4 | Cr 112 SmA 166 N* 177 I                         | 45       |
| 4-35 | <i>n</i> -OC <sub>4</sub> H <sub>9</sub>  | H | H | O(CH <sub>2</sub> ) <sub>10</sub> COO | 4 | Cr 99 SmA 130 N* 144 I                          | 45       |

|      |                                            |   |   |                                       |   |                                                   |    |
|------|--------------------------------------------|---|---|---------------------------------------|---|---------------------------------------------------|----|
| 4-36 | <i>n</i> -OC <sub>5</sub> H <sub>11</sub>  | H | H | O(CH <sub>2</sub> ) <sub>3</sub> COO  | 4 | Cr 174 SmA 188 N* 206 I                           | 45 |
| 4-37 | <i>n</i> -OC <sub>5</sub> H <sub>11</sub>  | H | H | O(CH <sub>2</sub> ) <sub>4</sub> COO  | 4 | Cr 117 SmA 126 N* 148 I                           | 45 |
|      |                                            |   |   |                                       |   | Cr 119.6 SmA 124.4 TGB 129.6 N* 150 I             | 46 |
| 4-38 | <i>n</i> -OC <sub>5</sub> H <sub>11</sub>  | H | H | O(CH <sub>2</sub> ) <sub>5</sub> COO  | 4 | Cr 143 SmA 169 N* 187 I                           | 45 |
|      |                                            |   |   |                                       |   | Cr 145.2 SmA 170.8 TGB 171 N* 188.5 I             | 46 |
| 4-39 | <i>n</i> -OC <sub>5</sub> H <sub>11</sub>  | H | H | O(CH <sub>2</sub> ) <sub>6</sub> COO  | 4 | Cr 86 N* 141 I                                    | 45 |
| 4-40 | <i>n</i> -OC <sub>5</sub> H <sub>11</sub>  | H | H | O(CH <sub>2</sub> ) <sub>7</sub> COO  | 4 | Cr 95 SmA 165 N* 171 I                            | 45 |
| 4-41 | <i>n</i> -OC <sub>5</sub> H <sub>11</sub>  | H | H | O(CH <sub>2</sub> ) <sub>10</sub> COO | 4 | Cr 99 SmA 131 N* 142 I                            | 45 |
| 4-42 | <i>n</i> -OC <sub>7</sub> H <sub>15</sub>  | H | H | O(CH <sub>2</sub> ) <sub>4</sub> COO  | 4 | Cr 112.3 SmA 139.4 TGB 140.5 N* 146.1 I           | 46 |
| 4-43 | <i>n</i> -OC <sub>8</sub> H <sub>17</sub>  | H | H | O(CH <sub>2</sub> ) <sub>4</sub> COO  | 4 | Cr 107.8 SmA 144.7 TGB 145.2 N* 147.8 I           | 46 |
| 4-44 | <i>n</i> -OC <sub>7</sub> H <sub>15</sub>  | H | H | O(CH <sub>2</sub> ) <sub>5</sub> COO  | 4 | Cr 139.7 SmA 167.2 TGB 168 N* 179.4 I             | 46 |
| 4-45 | <i>n</i> -OC <sub>8</sub> H <sub>17</sub>  | H | H | O(CH <sub>2</sub> ) <sub>5</sub> COO  | 4 | Cr 111.5 SmA 172.2 TGB 172.4 N* 177.5 I           | 46 |
| 4-46 | <i>n</i> -OC <sub>8</sub> H <sub>17</sub>  | F | F | O(CH <sub>2</sub> ) <sub>3</sub> COO  | 4 | Cr 127 SmC* (92.8) SmA 177.1 TGB <sup>b</sup> -N* | 47 |
|      |                                            |   |   |                                       |   | 179.9 I                                           |    |
| 4-47 | <i>n</i> -OC <sub>10</sub> H <sub>21</sub> | F | F | O(CH <sub>2</sub> ) <sub>3</sub> COO  | 4 | Cr 81.4 SmC* 105.8 SmA 174.3 I                    | 47 |
| 4-48 | <i>n</i> -OC <sub>8</sub> H <sub>17</sub>  | F | F | O(CH <sub>2</sub> ) <sub>4</sub> COO  | 4 | Cr 80.1 SmA 119.7 TGB <sup>b</sup> -N* 125.5 I    | 47 |
| 4-49 | <i>n</i> -OC <sub>10</sub> H <sub>21</sub> | F | F | O(CH <sub>2</sub> ) <sub>4</sub> COO  | 4 | Cr 83.4 SmA 121 TGB <sup>b</sup> -N* 121.7 I      | 47 |
| 4-50 | <i>n</i> -OC <sub>8</sub> H <sub>17</sub>  | F | F | O(CH <sub>2</sub> ) <sub>5</sub> COO  | 4 | Cr 67.4 SmC* 92.5 SmA 151.2 TGB <sup>b</sup> -N*  | 47 |
|      |                                            |   |   |                                       |   | 161.1 I                                           |    |
| 4-51 | <i>n</i> -OC <sub>10</sub> H <sub>21</sub> | F | F | O(CH <sub>2</sub> ) <sub>5</sub> COO  | 4 | Cr 62.1 SmC* 103.6 SmA 154.9 TGB <sup>b</sup> -N* | 47 |
|      |                                            |   |   |                                       |   | 156.8 I                                           |    |
| 4-52 | <i>n</i> -OC <sub>8</sub> H <sub>17</sub>  | F | F | O(CH <sub>2</sub> ) <sub>7</sub> COO  | 4 | Cr 77.1 TGBC* 85.8 SmA 117.5 TGB 124              | 47 |
|      |                                            |   |   |                                       |   | N* 145 I                                          |    |
| 4-53 | <i>n</i> -OC <sub>10</sub> H <sub>21</sub> | F | F | O(CH <sub>2</sub> ) <sub>7</sub> COO  | 4 | Cr 101.9 SmC* (94.2) SmA 132.4 TGB <sup>b</sup> - | 47 |
|      |                                            |   |   |                                       |   | N* 142 I                                          |    |
| 4-54 | CN                                         | H | H | O(CH <sub>2</sub> ) <sub>3</sub> O    | 4 | Cr 139 SmA (110) N* (118) I                       | 48 |
| 4-55 | CN                                         | H | H | O(CH <sub>2</sub> ) <sub>4</sub> O    | 4 | Cr 151 SmA 178 N* 210 I                           | 48 |
| 4-56 | CN                                         | H | H | O(CH <sub>2</sub> ) <sub>5</sub> O    | 4 | Cr 111 SmA 119 N* 146 I                           | 48 |
| 4-57 | CN                                         | H | H | O(CH <sub>2</sub> ) <sub>6</sub> O    | 4 | Cr 105 SmA 150 N* 188 I                           | 48 |
| 4-58 | CN                                         | H | H | O(CH <sub>2</sub> ) <sub>7</sub> O    | 4 | Cr 119 SmA (106) N* 147 I                         | 48 |
| 4-59 | CN                                         | H | H | O(CH <sub>2</sub> ) <sub>8</sub> O    | 4 | Cr 130 SmA (129) N* 172 I                         | 48 |

|             |                                            |   |   |                                       |   |                                                  |    |
|-------------|--------------------------------------------|---|---|---------------------------------------|---|--------------------------------------------------|----|
| <b>4-60</b> | CN                                         | H | H | O(CH <sub>2</sub> ) <sub>9</sub> O    | 4 | Cr 89 SmA 97 N* 144 I                            | 48 |
| <b>4-61</b> | CN                                         | H | H | O(CH <sub>2</sub> ) <sub>10</sub> O   | 4 | Cr 109 SmA 115 N* 160 I                          | 48 |
| <b>4-62</b> | CN                                         | H | H | O(CH <sub>2</sub> ) <sub>11</sub> O   | 4 | Cr 86 SmA 89 N* 140 I                            | 48 |
| <b>4-63</b> | CN                                         | H | H | O(CH <sub>2</sub> ) <sub>12</sub> O   | 4 | Cr 106 SmA (105) N* 151 I                        | 48 |
| <b>4-64</b> | <i>n</i> -OC <sub>4</sub> H <sub>9</sub>   | H | H | O(CH <sub>2</sub> ) <sub>4</sub> O    | 4 | Cr 160 N* 189 I                                  | 48 |
| <b>4-65</b> | <i>n</i> -OC <sub>4</sub> H <sub>9</sub>   | H | H | O(CH <sub>2</sub> ) <sub>5</sub> O    | 4 | Cr 119 N* 133 I                                  | 48 |
| <b>4-66</b> | <i>n</i> -OC <sub>4</sub> H <sub>9</sub>   | H | H | O(CH <sub>2</sub> ) <sub>6</sub> O    | 4 | Cr 128 SmA 148 N* 175 I                          | 48 |
| <b>4-67</b> | <i>n</i> -OC <sub>4</sub> H <sub>9</sub>   | H | H | O(CH <sub>2</sub> ) <sub>7</sub> O    | 4 | Cr 92 N* 135 I                                   | 48 |
| <b>4-68</b> | <i>n</i> -OC <sub>4</sub> H <sub>9</sub>   | H | H | O(CH <sub>2</sub> ) <sub>8</sub> O    | 4 | Cr 120 SmA 158 N* 167 I                          | 48 |
| <b>4-69</b> | <i>n</i> -OC <sub>4</sub> H <sub>9</sub>   | H | H | O(CH <sub>2</sub> ) <sub>9</sub> O    | 4 | Cr 111 SmA 116 N* 139 I                          | 48 |
| <b>4-70</b> | <i>n</i> -OC <sub>6</sub> H <sub>13</sub>  | H | H | O(CH <sub>2</sub> ) <sub>5</sub> O    | 4 | Cr 113 SmA (106) N* 131 I                        | 48 |
| <b>4-71</b> | <i>n</i> -OC <sub>6</sub> H <sub>13</sub>  | H | H | O(CH <sub>2</sub> ) <sub>6</sub> O    | 4 | Cr 143 SmA 151 N* 174 I                          | 48 |
| <b>4-72</b> | <i>n</i> -OC <sub>6</sub> H <sub>13</sub>  | H | H | O(CH <sub>2</sub> ) <sub>7</sub> O    | 4 | Cr 109 N* 131 I                                  | 48 |
| <b>4-73</b> | <i>n</i> -OC <sub>6</sub> H <sub>13</sub>  | H | H | O(CH <sub>2</sub> ) <sub>8</sub> O    | 4 | Cr 122 SmA 155 N* 161 I                          | 48 |
| <b>4-74</b> | <i>n</i> -OC <sub>6</sub> H <sub>13</sub>  | H | H | O(CH <sub>2</sub> ) <sub>9</sub> O    | 4 | Cr 99 SmA 117 N* 135 I                           | 48 |
| <b>4-75</b> | <i>n</i> -OC <sub>12</sub> H <sub>25</sub> | H | H | O(CH <sub>2</sub> ) <sub>4</sub> O    | 4 | Cr 103 SmC* (98) SmA 182 I                       | 49 |
| <b>4-76</b> | <i>n</i> -OC <sub>12</sub> H <sub>25</sub> | H | H | O(CH <sub>2</sub> ) <sub>5</sub> O    | 4 | Cr 67 SmC* 78 SmA 120 I                          | 49 |
| <b>4-77</b> | <i>n</i> -OC <sub>12</sub> H <sub>25</sub> | H | H | O(CH <sub>2</sub> ) <sub>6</sub> O    | 4 | Cr 100 SmC* 113 SmA 162 I                        | 49 |
| <b>4-78</b> | <i>n</i> -OC <sub>12</sub> H <sub>25</sub> | H | H | O(CH <sub>2</sub> ) <sub>7</sub> O    | 4 | Cr 68 SmC* 79 SmA 114 N* 116 I                   | 49 |
| <b>4-79</b> | <i>n</i> -OC <sub>12</sub> H <sub>25</sub> | H | H | O(CH <sub>2</sub> ) <sub>8</sub> O    | 4 | Cr 89 SmC* 105 SmA 138 N* 143 I                  | 49 |
| <b>4-80</b> | <i>n</i> -OC <sub>12</sub> H <sub>25</sub> | H | H | O(CH <sub>2</sub> ) <sub>9</sub> O    | 4 | Cr 88 SmC* 90 SmA 110 N* 122 I <sup>c</sup>      | 49 |
| <b>4-81</b> | <i>n</i> -OC <sub>12</sub> H <sub>25</sub> | H | H | O(CH <sub>2</sub> ) <sub>10</sub> O   | 4 | Cr 126 SmA 127 N* 137 I                          | 49 |
| <b>4-82</b> | <i>n</i> -OC <sub>12</sub> H <sub>25</sub> | H | H | O(CH <sub>2</sub> ) <sub>11</sub> O   | 4 | Cr 113 SmA (98) N* 120 I                         | 49 |
| <b>4-83</b> | <i>n</i> -OC <sub>12</sub> H <sub>25</sub> | H | H | O(CH <sub>2</sub> ) <sub>12</sub> O   | 4 | Cr 128 N* (125) I                                | 49 |
| <b>4-84</b> | <i>n</i> -OC <sub>12</sub> H <sub>25</sub> | H | H | O(CH <sub>2</sub> ) <sub>10</sub> COO | 4 | Cr 116 N* <sub>re</sub> (103) TGB (110) N* 127 I | 49 |

<sup>a</sup> The transition between different crystalline forms have not been considered; only the crystalline form (temperature) melting into the mesophase is mentioned. <sup>b</sup> A very short lived phase. <sup>c</sup> For this compound, the authors describe a N\*-TGB-SmA-TGB-N\* sequence during the cooling cycle, although transitions temperatures are not mentioned.

### 5. Chalcones (1,3-diphenylpropenones).

**Table S5**<sup>a</sup>: Phase sequence and transition temperatures of cholesterol-based dimers consisting of chalcone core.

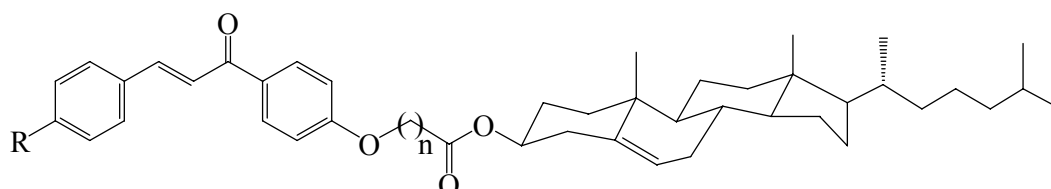

| Dimers      | R                                          | n | Phase sequence and transition temperatures in °C                   | Ref.     |
|-------------|--------------------------------------------|---|--------------------------------------------------------------------|----------|
| <b>5-1</b>  | <i>n</i> -OC <sub>10</sub> H <sub>21</sub> | 4 | Cr 118.9 TGBC* (81.6) TGBA 124.4 I                                 | 50<br>51 |
| <b>5-2</b>  | <i>n</i> -OC <sub>11</sub> H <sub>23</sub> | 4 | Cr 114.2 TGBC* (83.6) TGBA 125.4 I                                 | 50<br>51 |
| <b>5-3</b>  | <i>n</i> -OC <sub>12</sub> H <sub>25</sub> | 4 | Cr 116.3 TGBC* (82.5) TGBA 125.9 I                                 | 50<br>51 |
| <b>5-4</b>  | <i>n</i> -OC <sub>2</sub> H <sub>5</sub>   | 3 | Cr 171.9 N* (167.6) BP (168.8) I                                   | 51       |
| <b>5-5</b>  | <i>n</i> -OC <sub>4</sub> H <sub>9</sub>   | 3 | Cr 162.6 N* (154.1) BP (156.6) I                                   | 51       |
| <b>5-6</b>  | <i>n</i> -OC <sub>5</sub> H <sub>11</sub>  | 3 | Cr 158.2 N* (152.3) BP (153.7) I                                   | 51       |
| <b>5-7</b>  | <i>n</i> -OC <sub>6</sub> H <sub>13</sub>  | 3 | Cr 141.2 SmA (125)-TGB <sup>b</sup> -N* (138.7) BP (140) I         | 51       |
| <b>5-8</b>  | <i>n</i> -OC <sub>7</sub> H <sub>15</sub>  | 3 | Cr 153.8 SmA (143.7) TGB (144.7) N* (150.7) BP (151.9) I           | 51       |
| <b>5-9</b>  | <i>n</i> -OC <sub>8</sub> H <sub>17</sub>  | 3 | Cr 148.8 SmA 152.8 N* (146.7) BP (148) I                           | 51       |
| <b>5-10</b> | <i>n</i> -OC <sub>9</sub> H <sub>19</sub>  | 3 | Cr 145.8 SmA 150.5-TGB <sup>b</sup> -N*-(BP) <sup>b</sup> -151.2 I | 51       |
| <b>5-11</b> | <i>n</i> -OC <sub>10</sub> H <sub>21</sub> | 3 | Cr 140.8 SmA- N* <sup>b</sup> -(BP) <sup>b</sup> -150.8 I          | 51       |
| <b>5-12</b> | <i>n</i> -OC <sub>11</sub> H <sub>23</sub> | 3 | Cr 138.1 SmA 150.5 I                                               | 51       |
| <b>5-13</b> | <i>n</i> -OC <sub>12</sub> H <sub>25</sub> | 3 | Cr 136.8 SmA 151.8 I                                               | 51       |
| <b>5-14</b> | <i>n</i> -OC <sub>2</sub> H <sub>5</sub>   | 4 | Cr 125.3 N* 128.1 BP 132.4 I                                       | 51       |
| <b>5-15</b> | <i>n</i> -OC <sub>4</sub> H <sub>9</sub>   | 4 | Cr 117.5 N* 121.0 BP (122.3) I                                     | 51       |

|             |                                            |   |                                                                    |    |
|-------------|--------------------------------------------|---|--------------------------------------------------------------------|----|
| <b>5-16</b> | <i>n</i> -OC <sub>5</sub> H <sub>11</sub>  | 4 | Cr 126.1 N* (116.5) BP (124.1) I                                   | 51 |
| <b>5-17</b> | <i>n</i> -OC <sub>6</sub> H <sub>13</sub>  | 4 | Cr 132.2 N* (114.8) BP (116) I                                     | 51 |
| <b>5-18</b> | <i>n</i> -OC <sub>7</sub> H <sub>15</sub>  | 4 | Cr 132.5 N* (112.9) BP (120) I                                     | 51 |
| <b>5-19</b> | <i>n</i> -OC <sub>8</sub> H <sub>17</sub>  | 4 | Cr 149.1 SmA (145.4) N* 149 BP 149.8 I                             | 51 |
| <b>5-20</b> | <i>n</i> -OC <sub>9</sub> H <sub>19</sub>  | 4 | Cr 144.2 SmA 148.9-TGB <sup>b</sup> -N*-(BP) <sup>b</sup> -150.5 I | 51 |
| <b>5-21</b> | <i>n</i> -OC <sub>2</sub> H <sub>5</sub>   | 5 | Cr 189.9 I                                                         | 51 |
| <b>5-22</b> | <i>n</i> -OC <sub>4</sub> H <sub>9</sub>   | 5 | Cr 156.1 N* (146.4) BP (147.7) I                                   | 51 |
| <b>5-23</b> | <i>n</i> -OC <sub>5</sub> H <sub>11</sub>  | 5 | Cr 150.7 N* (141.5) BP (142.9) I                                   | 51 |
| <b>5-24</b> | <i>n</i> -OC <sub>6</sub> H <sub>13</sub>  | 5 | Cr 148.3 N* (135.9) BP (137.3) I                                   | 51 |
| <b>5-25</b> | <i>n</i> -OC <sub>7</sub> H <sub>15</sub>  | 5 | Cr 147 N* (138.5) BP (139.8) I                                     | 51 |
| <b>5-26</b> | <i>n</i> -OC <sub>8</sub> H <sub>17</sub>  | 5 | Cr 144.5 N* (136.8 ) BP (138.7) I                                  | 51 |
| <b>5-27</b> | <i>n</i> -OC <sub>9</sub> H <sub>19</sub>  | 5 | Cr 141.5 N* (134.9) BP (136.8) I                                   | 51 |
| <b>5-28</b> | <i>n</i> -OC <sub>10</sub> H <sub>21</sub> | 5 | Cr 138 SmA (132.9) N* (133.4) BP (135.7) I                         | 51 |
| <b>5-29</b> | <i>n</i> -OC <sub>11</sub> H <sub>23</sub> | 5 | Cr 136.4 SmA (134.3) N* (135.2) I                                  | 51 |
| <b>5-30</b> | <i>n</i> -OC <sub>12</sub> H <sub>25</sub> | 5 | Cr 135.1 SmA 137.2 I                                               | 51 |
| <b>5-31</b> | <i>n</i> -OC <sub>2</sub> H <sub>5</sub>   | 7 | Cr 151 N* (136.5) BP (140.8) I                                     | 51 |
| <b>5-32</b> | <i>n</i> -OC <sub>4</sub> H <sub>9</sub>   | 7 | Cr 161.1 N* (147.7) I                                              | 51 |
| <b>5-33</b> | <i>n</i> -OC <sub>5</sub> H <sub>11</sub>  | 7 | Cr 148.1 N* (128.2) BP (131.2) I                                   | 51 |
| <b>5-34</b> | <i>n</i> -OC <sub>6</sub> H <sub>13</sub>  | 7 | Cr 152.2 N* (128.8) BP (130.2) I                                   | 51 |
| <b>5-35</b> | <i>n</i> -OC <sub>7</sub> H <sub>15</sub>  | 7 | Cr 128.4 N* BP (129) 130 .2 I                                      | 51 |
| <b>5-36</b> | <i>n</i> -OC <sub>8</sub> H <sub>17</sub>  | 7 | Cr 126.6 N* BP (128.8) 129.7 I                                     | 51 |
| <b>5-37</b> | <i>n</i> -OC <sub>9</sub> H <sub>19</sub>  | 7 | Cr 123.7 SmA -TGB <sup>b</sup> -N* <sup>b</sup> BP (126.7) 128 I   | 51 |
| <b>5-38</b> | <i>n</i> -OC <sub>10</sub> H <sub>21</sub> | 7 | Cr 119.8 SmA 125.5 N* -BP <sup>b</sup> 128 I                       | 51 |
| <b>5-39</b> | <i>n</i> -OC <sub>11</sub> H <sub>23</sub> | 7 | Cr 116 SmA 117.8-TGB <sup>b</sup> -N* 121 BP 122.5 I               | 51 |
| <b>5-40</b> | <i>n</i> -OC <sub>12</sub> H <sub>25</sub> | 7 | Cr 121 SmA 120.9-TGB <sup>b</sup> -N* 123 BP 123.9 I               | 51 |

<sup>a</sup> The transition between different crystalline forms have not been considered; only the crystalline form melting (temperature) into the mesophase is mentioned. <sup>b</sup> A very short lived phase.

## 6. Bent-core (banana-shaped) systems

**Table S6:** Thermal behavior of cholesterol-based dimers comprising five-ring bent-core system. BP = Blue phase III;  $M_{x1}$ ,  $M_{x2}$  and  $M_{x3}$  = unknown tilted smectic mesophases;  $Col_{r1}$  and  $Col_{r2}$  = rectangular columnar phases.

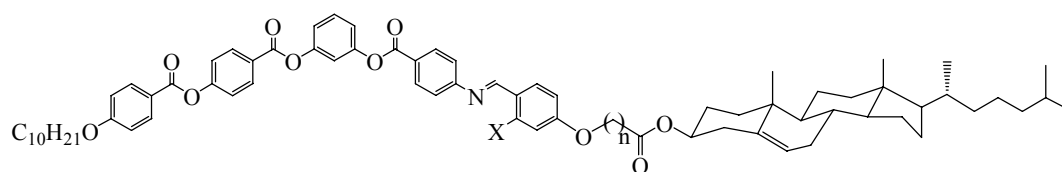

| Dimers     | n | X  | Phase sequence and transition temperatures in °C                                  | Ref. |
|------------|---|----|-----------------------------------------------------------------------------------|------|
| <b>6-1</b> | 3 | H  | Cr 145.6 $M_{x1}$ (124.1) N* 153 BP 171.5 I                                       | 52   |
| <b>6-2</b> | 3 | OH | Cr 158.1 $M_{x1}$ (154.2) N* 167 BP 186.3 I                                       | 52   |
| <b>6-3</b> | 4 | H  | Cr 122 $Col_r$ 137.8 I                                                            | 52   |
| <b>6-4</b> | 4 | OH | Cr 141.9 $Col_r$ 149.5 I                                                          | 52   |
| <b>6-5</b> | 5 | H  | Cr 145.9 $M_{x2}$ (108.9) $Col_{r2}$ (112.6) $Col_{r1}$ (118.4) N* 153 BP 164.2 I | 52   |
| <b>6-6</b> | 5 | OH | Cr 151.2 $M_{x3}$ (52) N* 160 BP 175.5 I                                          | 52   |
|            |   |    |                                                                                   | 53   |
| <b>6-7</b> | 7 | H  | Cr 122.6 $Col_r$ (114.7) N* 140 BP 152.6 I                                        | 52   |
| <b>6-8</b> | 7 | OH | Cr 156.8 $Col_r$ (138.9) N* (144) BP 163.5 I                                      | 52   |

## 7. Cyclohexanes

**Table S7:** Phase behavior of cholesterol-based dimers having cyclohexane-aromatic mesogenic segment.

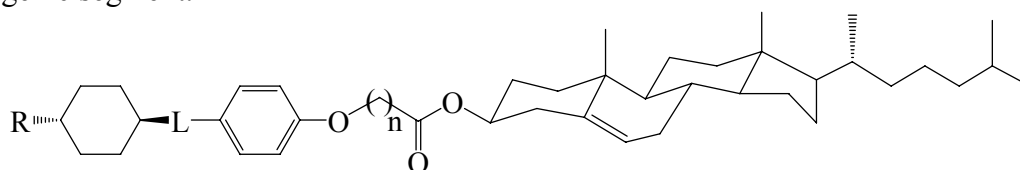

| Dimers | R                                        | L   | n | Phase sequence and transition temperatures in °C    | Ref. |
|--------|------------------------------------------|-----|---|-----------------------------------------------------|------|
| 7-1    | <i>n</i> -C <sub>5</sub> H <sub>11</sub> | COO | 3 | Cr 126.4 TGBC* (101.2) SmA 163.4 TGB 167.5 N* 210 I | 54   |
| 7-2    | <i>n</i> -C <sub>5</sub> H <sub>11</sub> | COO | 4 | Cr 94.8 N* 157.3 I                                  | 54   |
| 7-3    | <i>n</i> -C <sub>5</sub> H <sub>11</sub> | COO | 5 | Cr 94.6 TGBC* 133.8 N* 190 I                        | 54   |
| 7-4    | <i>n</i> -C <sub>5</sub> H <sub>11</sub> | COO | 7 | Cr 136 N* 174 4.I                                   | 54   |
| 7-5    | <i>n</i> -C <sub>3</sub> H <sub>7</sub>  | -   | 3 | Cr 145.5 N* 187.6 I                                 | 55   |
| 7-6    | <i>n</i> -C <sub>4</sub> H <sub>9</sub>  | -   | 3 | Cr 103.8 SmA 146.9 N* 186.7 I                       | 55   |
| 7-7    | <i>n</i> -C <sub>5</sub> H <sub>11</sub> | -   | 3 | Cr 122.3 SmA 164.0 N* 192.8 I                       | 55   |
| 7-8    | <i>n</i> -C <sub>6</sub> H <sub>13</sub> | -   | 3 | Cr 106.3 SmA 163.3 N* 183.2 I                       | 55   |
| 7-9    | <i>n</i> -C <sub>7</sub> H <sub>15</sub> | -   | 3 | Cr 128.5 SmA 172.7 N* 185.2 I                       | 55   |
| 7-10   | <i>n</i> -C <sub>8</sub> H <sub>17</sub> | -   | 3 | Cr 138.0 SmA 177.3 N* 184.0 I                       | 55   |
| 7-11   | <i>n</i> -C <sub>9</sub> H <sub>19</sub> | -   | 3 | Cr 116.7 SmA 162.1 N* 172.5 I                       | 55   |
| 7-12   | <i>n</i> -C <sub>3</sub> H <sub>7</sub>  | -   | 4 | Cr 105.8 N* 114.8 I                                 | 55   |
| 7-13   | <i>n</i> -C <sub>4</sub> H <sub>9</sub>  | -   | 4 | Cr 64.1 N* 98.5 I                                   | 55   |
| 7-14   | <i>n</i> -C <sub>5</sub> H <sub>11</sub> | -   | 4 | Cr 82.5 SmA 107.0 N* 132.3 I                        | 55   |
| 7-15   | <i>n</i> -C <sub>6</sub> H <sub>13</sub> | -   | 4 | Cr 97.3 SmA 109.7 N* 129.0 I                        | 55   |
| 7-16   | <i>n</i> -C <sub>7</sub> H <sub>15</sub> | -   | 4 | Cr 85.0 SmA 126.1 N* 134.0 I                        | 55   |
| 7-17   | <i>n</i> -C <sub>8</sub> H <sub>17</sub> | -   | 4 | Cr 96.0 SmA 121.1 N* 134.1 I                        | 55   |
| 7-18   | <i>n</i> -C <sub>9</sub> H <sub>19</sub> | -   | 4 | Cr 71.1 SmA 128.0 N* 133.2 I                        | 55   |
| 7-19   | <i>n</i> -C <sub>3</sub> H <sub>7</sub>  | -   | 5 | Cr 103.3 N* 141.1 I                                 | 55   |
| 7-20   | <i>n</i> -C <sub>4</sub> H <sub>9</sub>  | -   | 5 | Cr 101.8 N* 164.0 I                                 | 55   |
| 7-21   | <i>n</i> -C <sub>5</sub> H <sub>11</sub> | -   | 5 | Cr 84.9 N* 172.8 I                                  | 55   |
| 7-22   | <i>n</i> -C <sub>6</sub> H <sub>13</sub> | -   | 5 | Cr 99.7 SmA 138.2 N* 169.4 I                        | 55   |
| 7-23   | <i>n</i> -C <sub>7</sub> H <sub>15</sub> | -   | 5 | Cr 123.0 SmA 138.5 N* 161.2 I                       | 55   |
| 7-24   | <i>n</i> -C <sub>8</sub> H <sub>17</sub> | -   | 5 | Cr 111.1 SmA 152.1 N* 166.8 I                       | 55   |
| 7-25   | <i>n</i> -C <sub>9</sub> H <sub>19</sub> | -   | 5 | Cr 97.7 SmA 155.5 N* 165.0 I                        | 55   |

|      |                                          |   |   |                           |    |
|------|------------------------------------------|---|---|---------------------------|----|
| 7-26 | <i>n</i> -C <sub>3</sub> H <sub>7</sub>  | - | 7 | Cr 116.5 N* 154.7 I       | 55 |
| 7-27 | <i>n</i> -C <sub>4</sub> H <sub>9</sub>  | - | 7 | Cr 103.7 N* 154.3 I       | 55 |
| 7-28 | <i>n</i> -C <sub>5</sub> H <sub>11</sub> | - | 7 | Cr 98.1 N* 157.6 I        | 55 |
| 7-29 | <i>n</i> -C <sub>6</sub> H <sub>13</sub> | - | 7 | Cr 91.4 N* 154.6 I        | 55 |
| 7-30 | <i>n</i> -C <sub>7</sub> H <sub>15</sub> | - | 7 | Cr 85.6 N* 152.0 I        | 55 |
| 7-31 | <i>n</i> -C <sub>8</sub> H <sub>17</sub> | - | 7 | Cr 77.8 SmA 125.1 N* I    | 55 |
| 7-32 | <i>n</i> -C <sub>9</sub> H <sub>19</sub> | - | 7 | Cr 91.2 SmA 130.7 149.3 I | 55 |

### 8. Phenylbenzoates (esters)

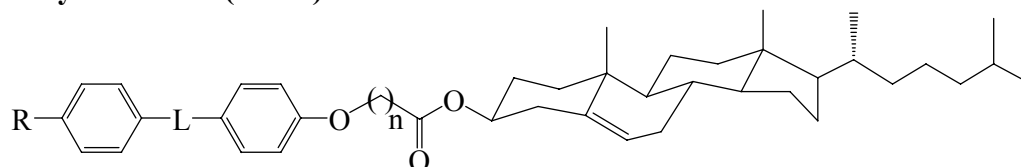

**Table S8:** Phase behavior of cholesterol-based dimers having phenylbenzoate core

| Dimers | R                                       | L   | n | Phase sequence and transition temperatures in °C             | Ref. |
|--------|-----------------------------------------|-----|---|--------------------------------------------------------------|------|
| 8-1    | <i>n</i> -C <sub>4</sub> H <sub>9</sub> | COO | 5 | Cr 119 Sm <sub>q1</sub> 142 TGB <sub>q1</sub> 144 N* 180.8 I | 24   |
| 8-2    | <i>n</i> -C <sub>4</sub> H <sub>9</sub> | OOC | 5 | Cr 85 N* 175.5 I                                             | 24   |
| 8-3    | CN                                      | COO | 3 | Cr 120.8 SmA 201.5-TGB <sup>a</sup> -N* 224.6 I              | 54   |
| 8-4    | CN                                      | COO | 4 | Cr 108.6 SmA 159.1-TGB <sup>a</sup> -N* 179.1 I              | 54   |
| 8-5    | CN                                      | COO | 5 | Cr 84.2 SmC* (58.6) SmA 178.2-TGB <sup>a</sup> -N* 212.7 I   | 54   |
| 8-6    | CN                                      | COO | 7 | Cr 96 SmA 148.5-TGB <sup>a</sup> -N* 187.2 I                 | 54   |

<sup>a</sup> An enantiotropic transient phase;

### 9. Salicylaldimines

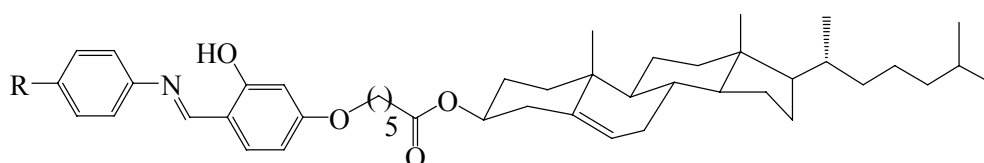

**Table S9:** Thermal behavior of cholesterol-based dimers having salicylaldimine segment.

| Dimers | R                                         | Phase sequence and transition temperatures in °C | Ref.     |
|--------|-------------------------------------------|--------------------------------------------------|----------|
| 9-1    | <i>n</i> -C <sub>4</sub> H <sub>9</sub>   | Cr 130.1 SmA 74.9 N* 203 I                       | 56<br>57 |
| 9-2    | <i>n</i> -C <sub>10</sub> H <sub>21</sub> | Cr 120.3 SmC* 153.6 SmA 185.6 N* 187.2 I         | 56<br>57 |
| 9-3    |                                           | Cr 116.7 SmC* 146.4 SmA 176.5 N* 179.6 I         | 56<br>57 |



### 10. Stilbenes (*trans*-1,2-diphenylethylenes)

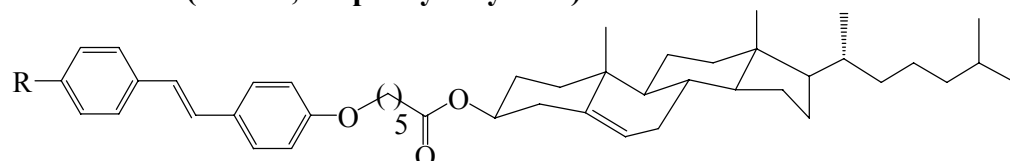

**Table S10:** Phase behavior of cholesterol-based dimers comprising stilbene moiety.

| Dimers      | R                                                                          | Phase sequence and transition temperatures in °C               | Ref. |
|-------------|----------------------------------------------------------------------------|----------------------------------------------------------------|------|
| <b>10-1</b> | <i>n</i> -C <sub>4</sub> H <sub>9</sub>                                    | Cr 125 Sm <sub>q3</sub> 190 TGB <sub>q3</sub> 191.7 N* 206.5 I | 24   |
| <b>10-2</b> | <i>n</i> -OC <sub>8</sub> H <sub>17</sub>                                  | Cr 133.6 SmA 204.7 N* 210.9 I                                  | 21   |
| <b>10-3</b> | <i>n</i> -OCH <sub>2</sub> (CF <sub>2</sub> ) <sub>6</sub> CF <sub>3</sub> | Cr 143.8 SmA 251.9 I                                           | 21   |

### 11. Diphenylbutadienes

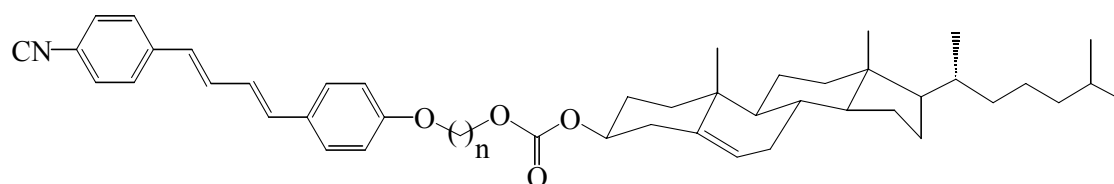

**Table S11:** Liquid crystal behavior of cholesterol-based dimers having diphenylbutadiene core. Cr<sub>1</sub> and Cr<sub>2</sub> = Crystalline states.

| Dimers      | <i>n</i> | Phase sequence and transition temperatures in °C                                 | Ref. |
|-------------|----------|----------------------------------------------------------------------------------|------|
| <b>11-1</b> | 8        | Cr <sub>1</sub> 99.5 SmA 112.8 Cr <sub>2</sub> 131.9 SmA 134 TGBA 138 N* 202.9 I | 58   |
| <b>11-2</b> | 11       | Cr 120.9 SmA 145.5 N* 175 I                                                      | 58   |
| <b>11-3</b> | 12       | Cr <sub>1</sub> 109.4 SmA 112.8 Cr <sub>2</sub> 129.5 N* 188.1 I                 | 58   |

## 12. Terphenyls

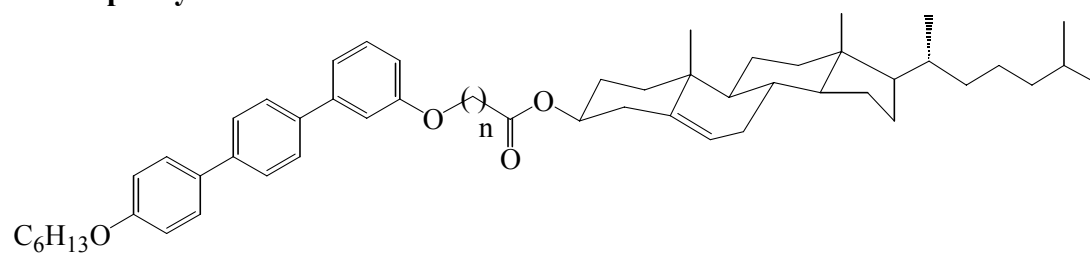

**Table S12:** Phase transitional properties of cholesterol-based dimers featuring terphenyl segment.

| Dimers      | n  | Phase sequence and transition temperatures in °C | Ref |
|-------------|----|--------------------------------------------------|-----|
| <b>12-1</b> | 3  | Cr 120 SmA 112 I                                 | 44  |
| <b>12-2</b> | 4  | Cr 113 SmA 153 I                                 | 44  |
| <b>12-3</b> | 5  | Cr 107 SmA 117 I                                 | 44  |
| <b>12-4</b> | 6  | Cr 101 SmA 139 I                                 | 44  |
| <b>12-5</b> | 7  | Cr 88 SmA 115 I                                  | 44  |
| <b>12-6</b> | 10 | Cr 94 SmA 124 I                                  | 44  |

## 13. Sydnones

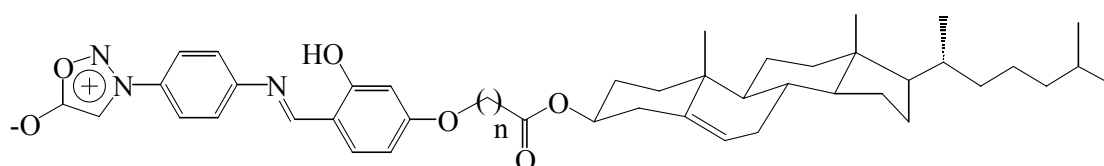

**Table S13:** Phase behavior of cholesterol-based dimers possessing sydnone core.

| Dimers      | n | Phase sequence and transition temperatures in °C | Ref |
|-------------|---|--------------------------------------------------|-----|
| <b>13-1</b> | 3 | Cr 230 SmA 265 <sup>a</sup>                      | 59  |
| <b>13-2</b> | 4 | Cr 162 SmA 210 <sup>a</sup>                      | 59  |
| <b>13-3</b> | 5 | Cr 170 SmA 215 <sup>a</sup>                      | 59  |
| <b>13-4</b> | 7 | Cr 242 SmA 270 <sup>a</sup>                      | 59  |

<sup>a</sup> SmA – I has not been ascertained by either microscopy or calorimetric techniques, owing to thermal degradation above this temperature.

## 14. Supramolecular (H-bonded) systems

**Table S14**<sup>a</sup>: Thermal behavior of supramolecular cholesterol-based dimers.

Sm<sub>LT</sub> = Low temperature smectic phase; Sm<sub>HT</sub> = High temperature smectic phase

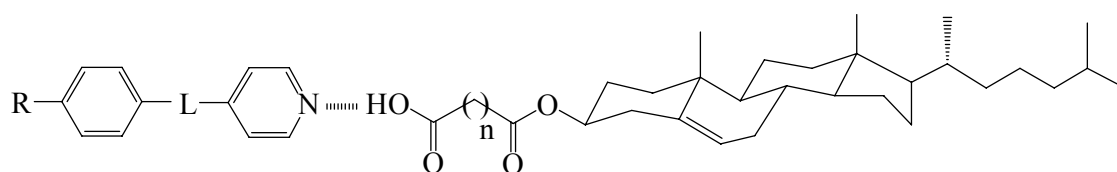

| Dimers       | R                                                                                 | L     | n | Phase sequence and transition temperatures in °C        | Ref |
|--------------|-----------------------------------------------------------------------------------|-------|---|---------------------------------------------------------|-----|
| <b>14-1</b>  | 4-( <i>n</i> -OCH <sub>3</sub> )C <sub>6</sub> H <sub>4</sub> COO                 | CH=CH | 2 | Cr 133.7 SmC* 190 N* 229.3 I                            | 22  |
| <b>14-2</b>  | 4-( <i>n</i> -OC <sub>2</sub> H <sub>5</sub> )C <sub>6</sub> H <sub>4</sub> COO   | CH=CH | 2 | Cr 152.2 SmC* 186 N* 234.6 I                            | 22  |
| <b>14-3</b>  | 4-( <i>n</i> -OC <sub>3</sub> H <sub>7</sub> )C <sub>6</sub> H <sub>4</sub> COO   | CH=CH | 2 | Cr 145.6 SmC* 187 N* 224.4 I                            | 22  |
| <b>14-4</b>  | 4-( <i>n</i> -OC <sub>4</sub> H <sub>9</sub> )C <sub>6</sub> H <sub>4</sub> COO   | CH=CH | 2 | Cr 157 SmC* 183 N* 231.4 I                              | 22  |
| <b>14-5</b>  | 4-( <i>n</i> -OC <sub>5</sub> H <sub>11</sub> )C <sub>6</sub> H <sub>4</sub> COO  | CH=CH | 2 | Cr 149.2 SmC* 185 N* 226.4 I                            | 22  |
| <b>14-6</b>  | 4-( <i>n</i> -OC <sub>6</sub> H <sub>13</sub> )C <sub>6</sub> H <sub>4</sub> COO  | CH=CH | 2 | Cr 148.5 SmC* 190 N* 222.3 I                            | 22  |
| <b>14-7</b>  | 4-( <i>n</i> -OC <sub>7</sub> H <sub>15</sub> )C <sub>6</sub> H <sub>4</sub> COO  | CH=CH | 2 | Cr 150.7 SmC* 187.2 N* 219.1 I                          | 22  |
| <b>14-8</b>  | 4-( <i>n</i> -OC <sub>8</sub> H <sub>17</sub> )C <sub>6</sub> H <sub>4</sub> COO  | CH=CH | 2 | Cr 151.8 SmC* 195.3 N* 218.7 I                          | 22  |
| <b>14-9</b>  | 4-( <i>n</i> -OC <sub>10</sub> H <sub>21</sub> )C <sub>6</sub> H <sub>4</sub> COO | CH=CH | 2 | Cr 148.8 SmC* 190.6 N* 209.1 I                          | 22  |
| <b>14-10</b> | <i>n</i> -OC <sub>2</sub> H <sub>5</sub>                                          | N=CH  | 2 | Cr 113.8 SmA 126 N* 156.6 I                             | 22  |
| <b>14-11</b> | <i>n</i> -OC <sub>5</sub> H <sub>11</sub>                                         | N=CH  | 2 | Cr 103.1 SmA 140 N* 149.6 I                             | 22  |
| <b>14-12</b> | <i>n</i> -OC <sub>7</sub> H <sub>15</sub>                                         | N=CH  | 2 | Cr 115.4 N* 144.9 I                                     | 22  |
| <b>14-13</b> | <i>n</i> -OC <sub>10</sub> H <sub>21</sub>                                        | N=CH  | 2 | Cr 110 SmA 120 N* 141.4 I                               | 22  |
| <b>14-14</b> | 4-( <i>n</i> -OC <sub>4</sub> H <sub>9</sub> )C <sub>6</sub> H <sub>4</sub> COO   | N=CH  | 4 | Cr 126 Sm <sub>LT</sub> (116) Sm <sub>HT</sub> 145 N* I | 60  |
| <b>14-15</b> | 4-( <i>n</i> -OC <sub>10</sub> H <sub>21</sub> )C <sub>6</sub> H <sub>4</sub> COO | N=CH  | 4 | Cr 126 Sm 135 N* 192 I                                  | 60  |

<sup>a</sup> The transition between different crystalline forms have not been considered; only the crystalline form (temperature) melting into the mesophase is mentioned
